# Supplementary material for: Clinical Impact of 5 Years of Liraglutide Treatment on Cardiovascular Risk Factors in Patients with Type 2 Diabetes Mellitus in a Real-Life Setting in Italy: An Observational Study
Source: Springer Nature journal article supplement (doi:10.1007/s13300-018-0503-4), 2018-09-20

SUPPLEMENTARY MATERIALS

Figure S1: Trend of 60-month Hba1c vs baseline \* p <0.001. Bars are standard errors

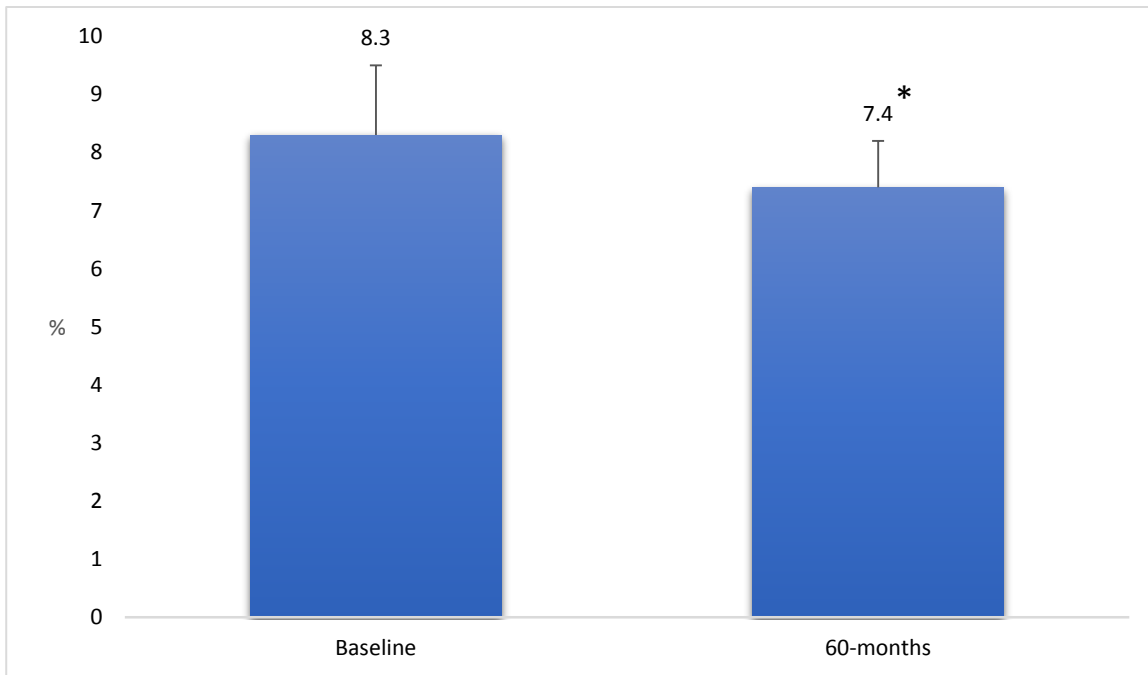

Figure S2: Percentage of patients with HbA1c <7% at baseline and 60 months. \* p = 0.02 vs baseline

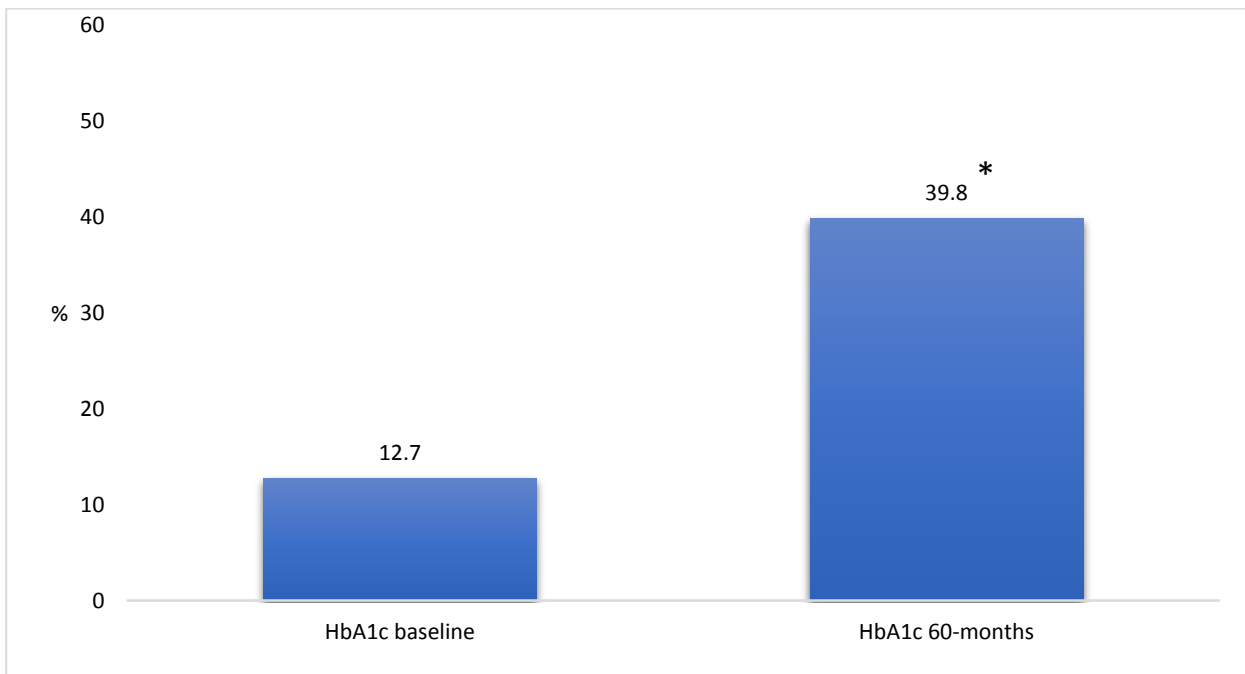

**Figure S3: Trend of fasting plasma glucose at 60 months vs baseline \* p <0.001. Bars are standard errors**

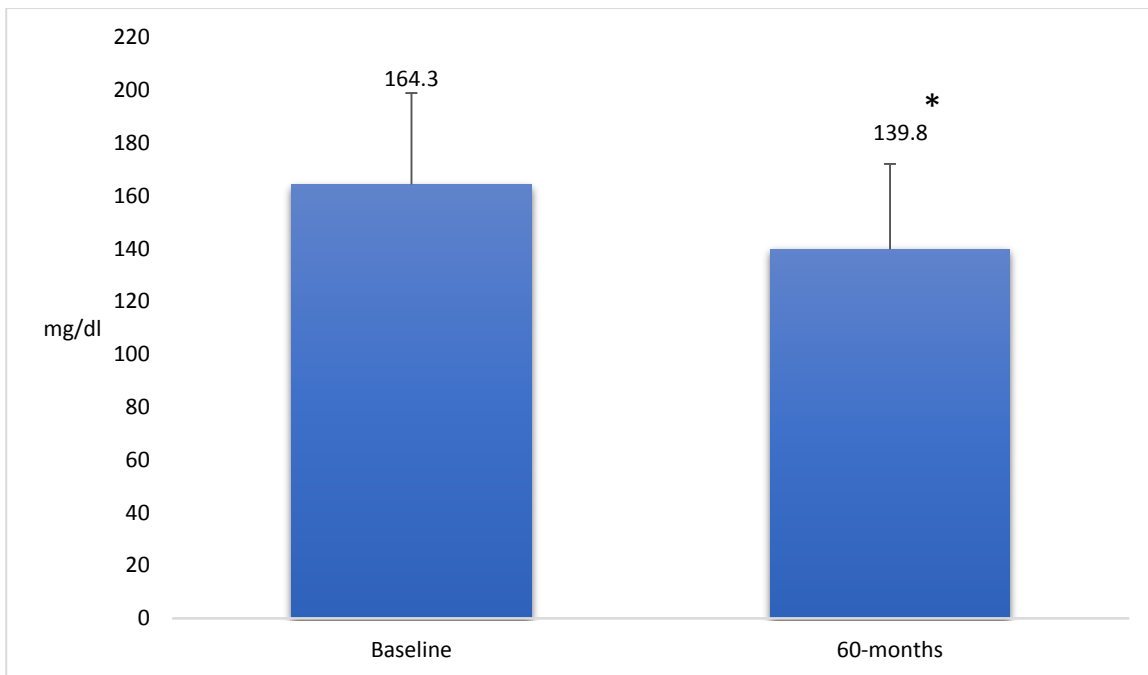

**Figure S4: Trend of body weight at 60 months vs baseline \* p <0.001. Bars are standard errors**

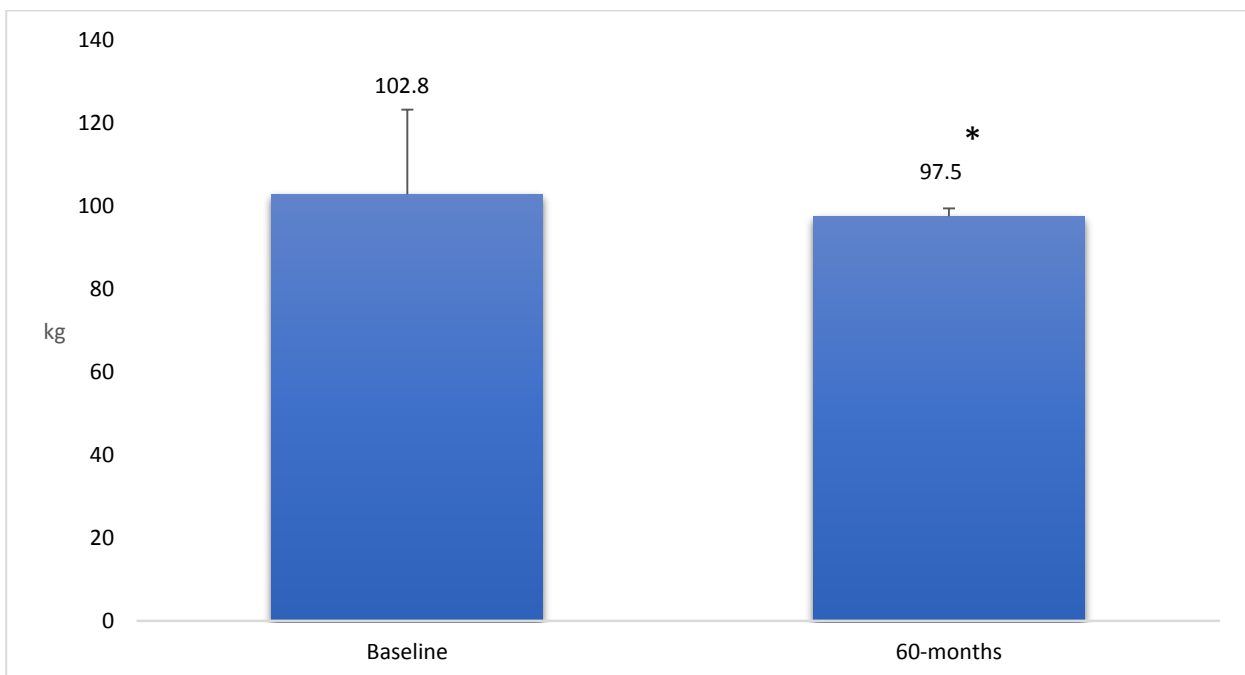

Figure S5: Changes in systolic blood pressure (SBP) and diastolic blood pressure (DBP) at 60 months vs baseline \* p < 0.001. Bars are standard errors

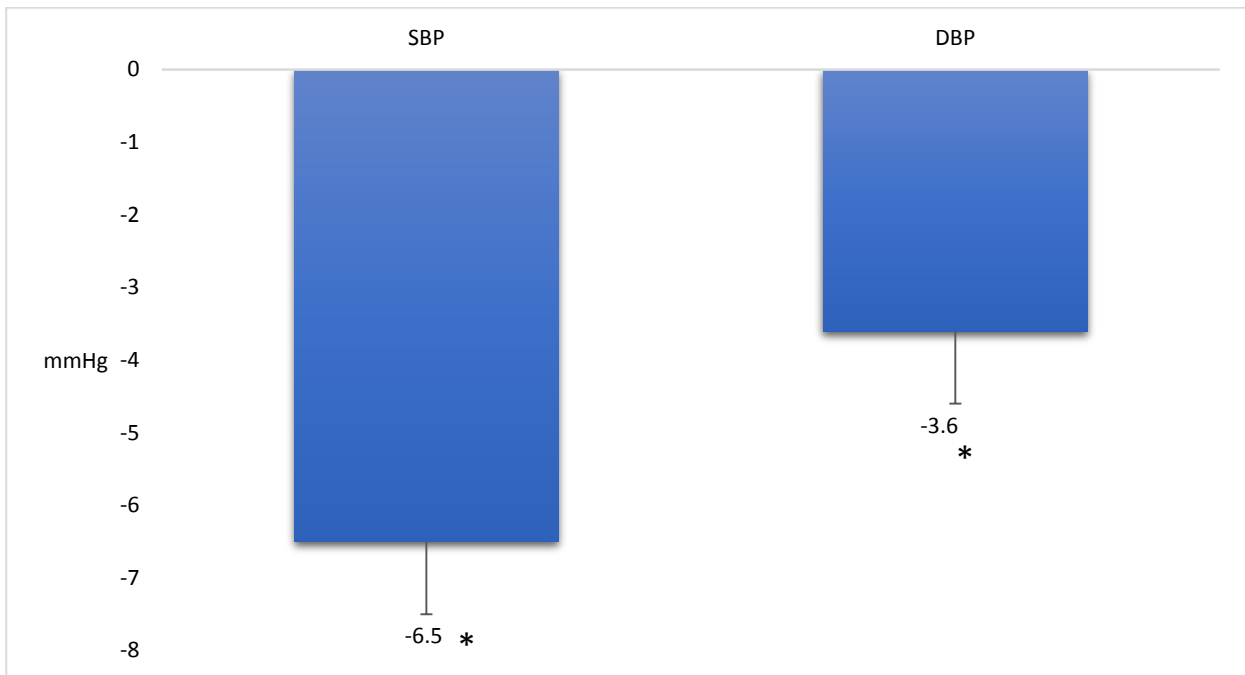

Figure S6: Lipid profile changes: total cholesterol (COL), triglycerides (TG), low density lipoproteins (LDL), high density lipoproteins (HDL) at 60 months vs baseline \* p < 0.001 ≠ p = 0.001. Bars are standard errors

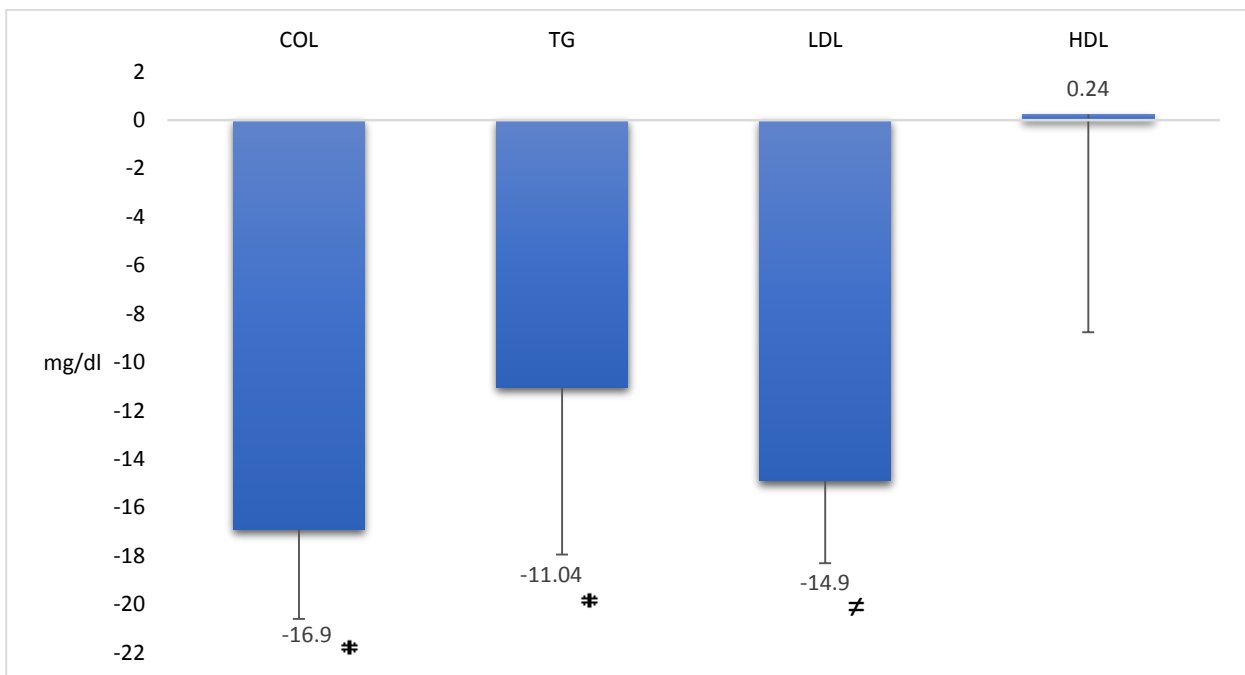

Supplement: MOESM1 [file 16139850]
